# Supplementary material for: Virtually Possible: Enhancing Quality Control of 3D-Printed Medicines with Machine Vision Trained on Photorealistic Images
Source: MDPI journal article supplement (doi:10.3390/pharmaceutics15112630), 2023-11-16
Supplement: s1 [file s1]

# Virtually Possible: Enhancing Quality Control of 3D-Printed Medicines with Machine Vision Trained on Photorealistic Images

Siyuan Sun <sup>1</sup>, Manal E. Alkahtani <sup>1,2</sup>, Simon Gaisford <sup>1</sup>, Abdul W. Basit <sup>1</sup>, Moe Elbadawi <sup>1,3,\*</sup> and Mine Orlu <sup>1,\*</sup>

<sup>1</sup> UCL School of Pharmacy, University College London, 29-39 Brunswick Square, London WC1N 1AX, UK

<sup>2</sup> Department of Pharmaceutics, College of Pharmacy, Prince Sattam bin Abdulaziz University, Alkharj 11942, Saudi Arabia

<sup>3</sup> School of Biological and Behavioural Sciences, Queen Mary University of London, Mile End Road, London E1 4DQ, UK

\* Correspondence: m.elbadawi@qmul.ac.uk (M.E.); m.orlu@ucl.ac.uk (M.O.)

Table S1. MLTs and their parameters for grid search.

| MLT                            | Parameters                                                                     |
|--------------------------------|--------------------------------------------------------------------------------|
| <b>Decision Tree</b>           | Splitter = ['best', 'random']                                                  |
|                                | max_depth = [None, 4,5,6,7,8]                                                  |
|                                | criterion = ['gini', 'entropy', 'log_loss']                                    |
|                                | min_samples_leaf = [1,2,3,4,5]                                                 |
|                                | max_features = ['auto', 'sqrt', 'log2']                                        |
| <b>Random Forest</b>           | n_estimators = [2,3,4,5,6,7,8,9,10]                                            |
|                                | max_features = ['auto', 'sqrt', 'log2']                                        |
|                                | max_depth = [4,5,6,7,8]                                                        |
|                                | criterion = ['gini', 'entropy']                                                |
| <b>Gradient Boost</b>          | max_features = ['auto', 'sqrt', 'log2']                                        |
|                                | loss = ['log_loss', 'deviance', 'exponential']                                 |
|                                | learning_rate_init = [0.1]                                                     |
|                                | n_estimators = [2,3,4,5,6,7,8,9,10]                                            |
|                                | max_depth = [4,5,6,7,8]                                                        |
| <b>Logistic Regression</b>     | C = [1,2,3,4,5,6,7,8,9,10]                                                     |
|                                | penalty = [None, 'l1', 'l2', 'elasticnet']                                     |
|                                | solver = ['lbfgs', 'liblinear', 'newton-cg', 'newton-cholesky', 'sag', 'saga'] |
| <b>Multi-layer perceptron</b>  | neurons = [1,10,25,50,100]                                                     |
|                                | activation = ['identity', 'logistic', 'tanh', 'relu']                          |
|                                | learning_rate_init = [0.1, 0.001, 0.00001]                                     |
| <b>k-nearest neighbour</b>     | n_neighbors = [1,2,3,4,5,6,7,8,9,10, 12, 15]                                   |
|                                | weights = ['uniform', 'distance']                                              |
|                                | algorithm = ['auto', 'ball_tree', 'kd_tree', 'brute']                          |
| <b>Support Vector Machines</b> | C = [1,2,3,4,5,6,7,8,9,10]                                                     |
|                                | kernel = ['rbf', 'linear', 'poly', 'sigmoid']                                  |
|                                | shrinking = [True, False]                                                      |

|         | Original                                                                          | 256x256                                                                           | 125x125                                                                           | 25x25                                                                               |
|---------|-----------------------------------------------------------------------------------|-----------------------------------------------------------------------------------|-----------------------------------------------------------------------------------|-------------------------------------------------------------------------------------|
| Virtual | 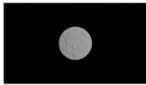 |  |  |  |
| Real    |  |  |  |  |

Figure S1. Representative images of tablets following re-sizing.

|         | Original                                                                            | 256x256                                                                             | 125x125                                                                             | 25x25                                                                                 |
|---------|-------------------------------------------------------------------------------------|-------------------------------------------------------------------------------------|-------------------------------------------------------------------------------------|---------------------------------------------------------------------------------------|
| Virtual |    |   |    |    |
| Real    |  |  |  |  |

Figure S2. Representative images of films following re-sizing.

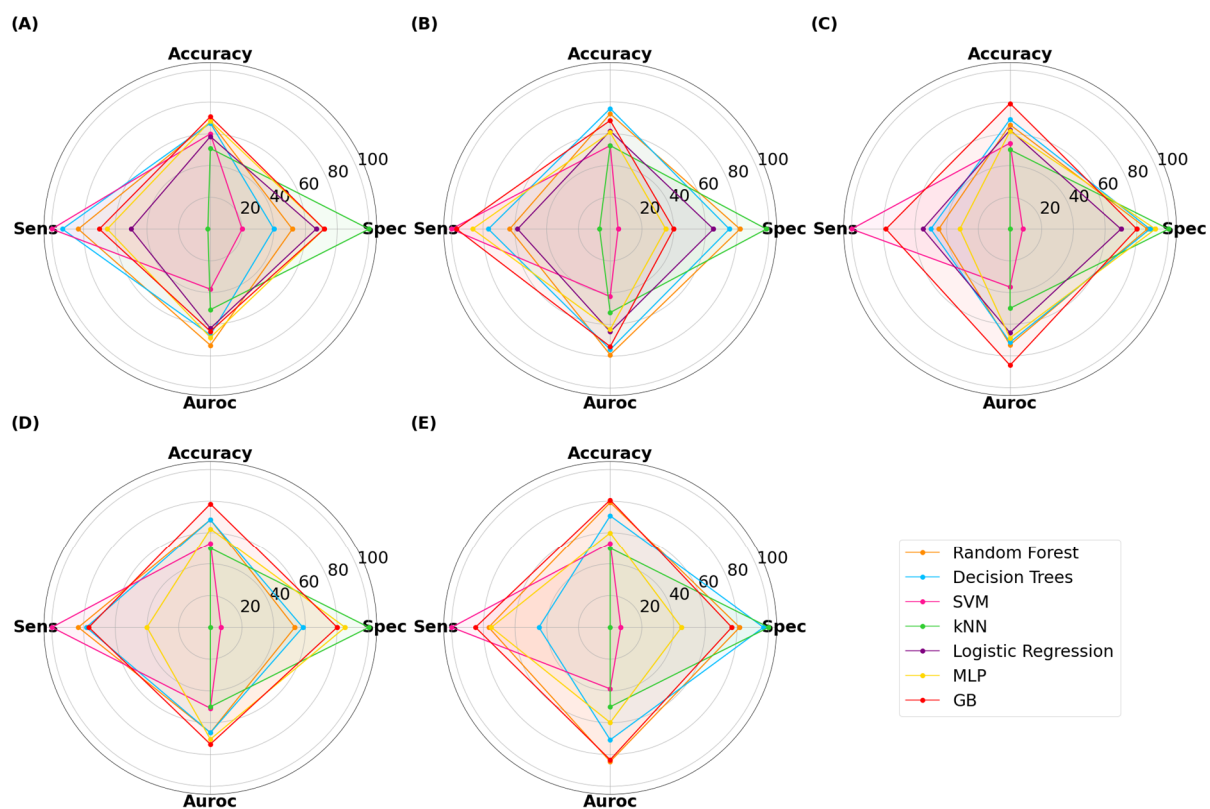

Figure S3. MLTs performance for classifying SLA-printed capsules after grayscale transformation, with image sizes of (A) 25 pixels, (B), 50 pixels, (C) 125 pixels, (D) 256 pixels and (E) 512 pixels.

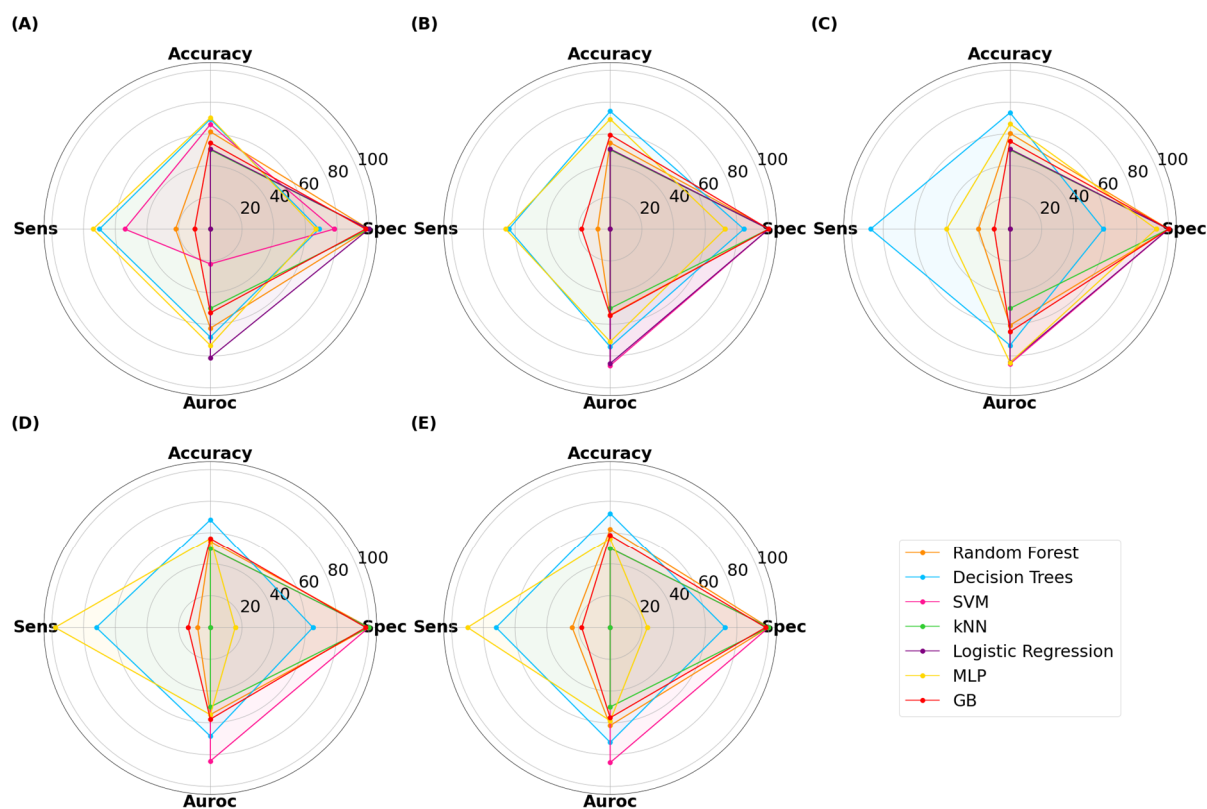

Figure S4. MLTs performance for classifying SLA-printed tablets after grayscale transformation, with image sizes of (A) 25 pixels, (B), 50 pixels, (C) 125 pixels, (D) 256 pixels and (E) 512 pixels.

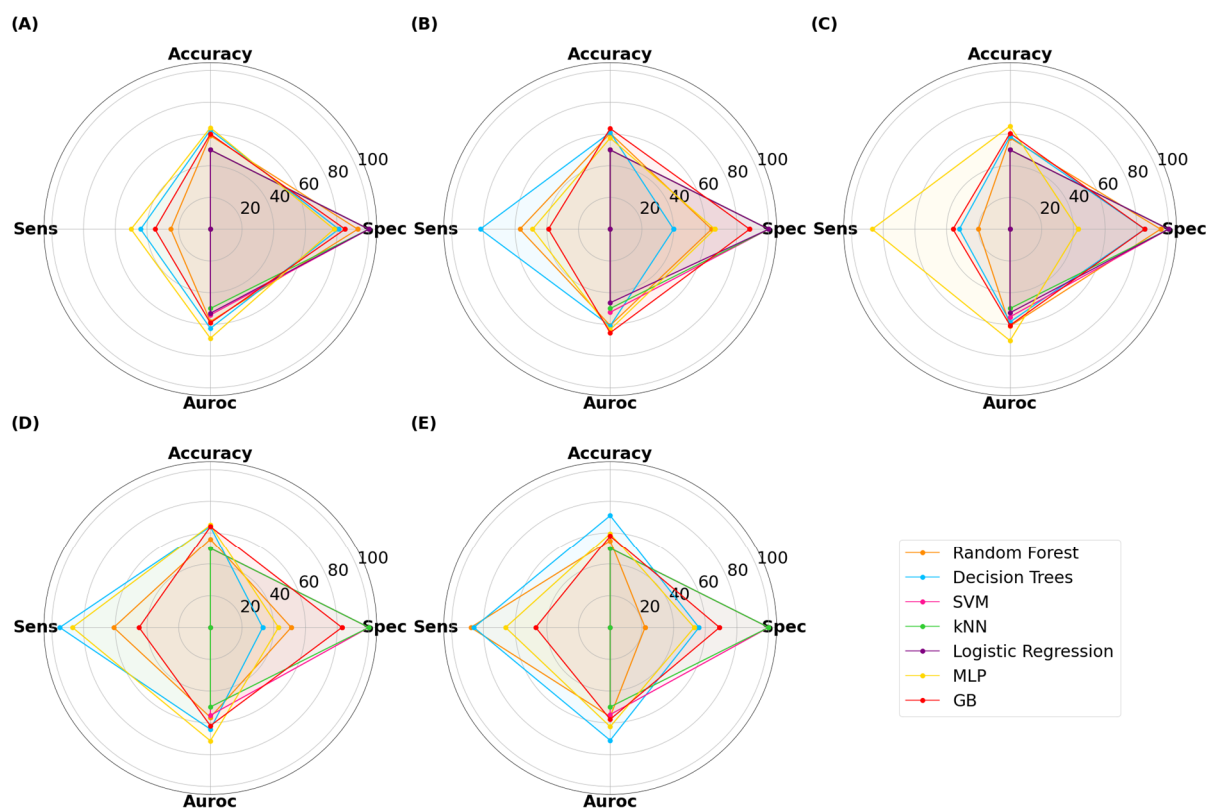

*Figure S5. MLTs performance for classifying SLA-printed films after grayscale transformation, with image sizes of (A) 25 pixels, (B), 50 pixels, (C) 125 pixels, (D) 256 pixels and (E) 512 pixels.*
